# Supplementary material
Source: PubMed Central journal article supplement (PMC8764570)
Supplement: saab036_suppl_supplementary_material.pdf [file saab036_suppl_supplementary_material.pdf]

**From:** Ania A. Majewska majewska.ania@gmail.com  
**Subject:** Re: Monarch life cycle drawing  
**Date:** December 21, 2020 at 12:34 PM  
**To:** Henry Adams hankcrawdadams@gmail.com  
**Cc:** Victoria Pocius vmpocius@gmail.com, Micah Freedman mfreedman@ucdavis.edu

---

Fantastic. Thank you so much.

Stay warm and healthy!

-Ania

---

Ania Majewska, MS, PhD  
NIH IRACDA  
Postdoctoral Fellow  
Emory University  
Biology Department

---

On Mon, Dec 21, 2020 at 1:32 PM Henry Adams <[hankcrawdadams@gmail.com](mailto:hankcrawdadams@gmail.com)> wrote:

Hey Ania!!

I'm so sorry, I had composed a response to your instagram message and then never hit send aghhh!! Thanks for reaching out...of course you may use it...if the credit could read: Illustrations by Henry Crawford Adams, that'd be fantastic!!

All the best!  
Henry

> On Dec 21, 2020, at 1:29 PM, Ania A. Majewska <[majewska.ania@gmail.com](mailto:majewska.ania@gmail.com)> wrote:

>

>

> Hello Henry

>

> I hope this email finds you well. I saw your recent art pieces on Instagram and they are so beautiful.

>

> I am writing a review paper on research that informs monarch conservation with two postdoc friends, Tori and Micah (copied here) and we were searching for monarch drawings to include in our paper as part of the graphical abstract. I recalled that you drew the monarch life cycle (attached) for Sonia Altizer back in 2015 and we think it would work super well for us. We would therefore like your permission to use this image. We would give you credit of course.

>

> Please let me know what you think,

>

> all the best,

>

> -Ania

>

>

>

> \_\_\_\_\_  
> Ania Majewska, MS, PhD

> NIH IRACDA

> Postdoctoral Fellow

> Emory University

> Biology Department

>

> \_\_\_\_\_  
> <LifeCycle.pdf>
